## Correction

# Correction: Red Algae Natural Products for Prevention of Lipopolysaccharides (LPS)-induced liver and kidney inflammation and Injuries

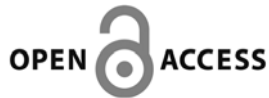

The abstract of the original article “Red Algae Natural Products for Prevention of Lipopolysaccharides (LPS)-induced liver and kidney inflammation and Injuries” (*Biosci Rep* (2021) 41(1), <https://doi.org/10.1042/BSR20202022>) had been published with an error that had been introduced at an early editing stage. The name ‘*G. oblongata*’ should have been expanded to ‘*Galaxaura oblongata*’ rather than ‘*Gromphadorhina oblongata*’ as was stated on the Version of Record. This typographical error was updated on the original article on 18 October 2021.

Version of Record published:  
18 October 2021
